# Supplementary material
Source: PubMed Central journal article supplement (PMC4949065)
Supplement: 10-1055-s-0036-1571333_s150017-1.pdf [file 10-1055-s-0036-1571333_s150017-1.pdf]

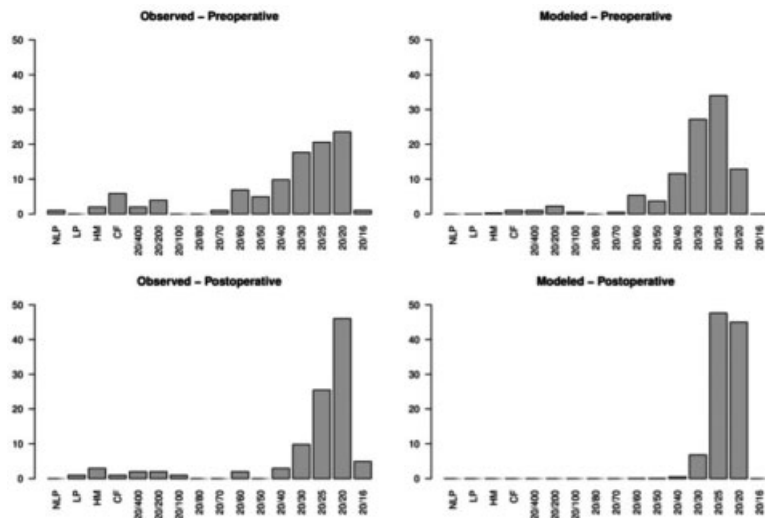

**Supplemental Fig. 1** Bar graph representations showing the density distribution of patients in ordinal categories for observed and modeled data. Modeled percentages and densities in each ordinal category, while similar to the observed data, tends to slightly underestimate the lower categories (pre-operative CF and post-operative HM) and over-state the post-operative 20/25 category. The model is, however, observed to adequately fit the observed data, showing an improvement in postoperative visual acuity.
