# Supplementary material
Source: PubMed Central journal article supplement (PMC4949065)
Supplement: 10-1055-s-0036-1571333_s150017-2.pdf [file 10-1055-s-0036-1571333_s150017-2.pdf]

**Supplemental Table 1** 16-point ordinal scale assigned to corresponding visual acuities for statistical analysis

|    |        |
|----|--------|
| 15 | 20/16  |
| 14 | 20/20  |
| 13 | 20/25  |
| 12 | 20/30  |
| 11 | 20/40  |
| 10 | 20/50  |
| 9  | 20/60  |
| 8  | 20/70  |
| 7  | 20/80  |
| 6  | 20/100 |
| 5  | 20/200 |
| 4  | 20/400 |
| 3  | CF     |
| 2  | HM     |
| 1  | LP     |
| 0  | NLP    |

**Supplemental Table 2** Estimated z score latent thresholds corresponding to the ordinal values assigned in supplemental table 1.

|    |       |
|----|-------|
| 1  | -4.27 |
| 2  | -3.73 |
| 3  | -2.81 |
| 4  | -2.25 |
| 5  | -2.01 |
| 6  | -1.70 |
| 7  | -1.66 |
| 8  | -1.66 |
| 9  | -1.61 |
| 10 | -1.24 |
| 11 | -1.06 |
| 12 | -0.64 |
| 13 | 0.08  |
| 14 | 1.13  |
| 15 | 3.74  |

**Supplemental Table 3** Percentage of patients falling within each visual acuity ordinal category for both observed values (left) and modeled values (right)

| Observed VA % |        |        |        | Modeled VA % |        |        |        |
|---------------|--------|--------|--------|--------------|--------|--------|--------|
|               | VA     | Preop  | Postop |              | VA     | Preop  | Postop |
| 1             | NLP    | 0.98   | 0.00   | 1            | NLP    | 0.00   | 0.00   |
| 2             | LP     | 0.00   | 0.98   | 2            | LP     | 0.01   | 0.00   |
| 3             | HM     | 1.96   | 2.94   | 3            | HM     | 0.24   | 0.00   |
| 4             | CF     | 5.88   | 0.98   | 4            | CF     | 0.98   | 0.00   |
| 5             | 20/400 | 1.96   | 1.96   | 5            | 20/400 | 0.97   | 0.00   |
| 6             | 20/200 | 3.92   | 1.96   | 6            | 20/200 | 2.23   | 0.00   |
| 7             | 20/100 | 0.00   | 0.98   | 7            | 20/100 | 0.46   | 0.00   |
| 8             | 20/80  | 0.00   | 0.00   | 8            | 20/80  | 0.00   | 0.00   |
| 9             | 20/70  | 0.98   | 0.00   | 9            | 20/70  | 0.49   | 0.00   |
| 10            | 20/60  | 6.86   | 1.96   | 10           | 20/60  | 5.31   | 0.03   |
| 11            | 20/50  | 4.90   | 0.00   | 11           | 20/50  | 3.68   | 0.05   |
| 12            | 20/40  | 9.80   | 2.94   | 12           | 20/40  | 11.59  | 0.49   |
| 13            | 20/30  | 17.65  | 9.80   | 13           | 20/30  | 27.17  | 6.79   |
| 14            | 20/25  | 20.59  | 25.49  | 14           | 20/25  | 33.98  | 47.66  |
| 15            | 20/20  | 23.53  | 46.08  | 15           | 20/20  | 12.89  | 44.98  |
| 16            | 20/16  | 0.98   | 4.90   | 16           | 20/16  | 0.01   | 0.00   |
|               |        | 100.00 | 100.00 |              |        | 100.00 | 100.00 |
